# Supplementary material
Source: PubMed Central journal article supplement (PMC5117632)
Supplement: NIHMS810261-supplement-1.pdf [file NIHMS810261-supplement-1.pdf]

**Discovery of MRSA active antibiotics using primary sequence from the human microbiome**

John Chu,<sup>1‡</sup> Xavier Vila-Farres,<sup>1‡</sup> Daigo Inoyama,<sup>3</sup> Melinda Ternei,<sup>1</sup> Louis J. Cohen,<sup>1</sup> Emma A. Gordon,<sup>1</sup> Boojala Vijay B. Reddy,<sup>1</sup> Zachary Charlop-Powers,<sup>1</sup> Henry A. Zebroski,<sup>2</sup> Ricardo Gallardo-Macias,<sup>3</sup> Mark Jaskowski,<sup>3</sup> Shruthi Satish,<sup>3</sup> Steven Park,<sup>4</sup> David S. Perlin,<sup>4</sup> Joel S. Freundlich,<sup>3</sup> and Sean F. Brady<sup>1\*</sup>

<sup>1</sup>Laboratory of Genetically Encoded Small Molecules and <sup>2</sup>Proteomics Resource Center, The Rockefeller University, New York, New York, USA. <sup>3</sup>Department of Pharmacology, Physiology, and Neuroscience, Rutgers University – New Jersey Medical School, Newark, New Jersey, USA. <sup>4</sup>Public Health Research Institute, Rutgers University – New Jersey Medical School, Newark, New Jersey, USA.

‡These authors contributed equally to this work. \*Corresponding author e-mail: [sbrady@rockefeller.edu](mailto:sbrady@rockefeller.edu).

**Supplementary Results**

|                                                                                             |    |
|---------------------------------------------------------------------------------------------|----|
| <b>Supplementary Figure 1.</b> Stereochemistry assignment of humimycin A                    | 2  |
| <b>Supplementary Figure 2.</b> Scope of the syn-BNP approach                                | 3  |
| <b>Supplementary Figure 3.</b> SNPs in SAV1754 that confer humimycin resistance             | 4  |
| <b>Supplementary Figure 4.</b> <sup>1</sup> H NMR spectrum of humimycin A                   | 5  |
| <b>Supplementary Figure 5.</b> <sup>13</sup> C NMR spectrum of humimycin A                  | 6  |
| <b>Supplementary Figure 6.</b> <sup>1</sup> H NMR spectrum of humimycin B                   | 7  |
| <b>Supplementary Figure 7.</b> <sup>13</sup> C NMR spectrum of humimycin B                  | 8  |
| <b>Supplementary Table 1.</b> List of all syn-BNPs for this study                           | 9  |
| <b>Supplementary Table 2.</b> Bacteria strain information                                   | 10 |
| <b>Supplementary Table 3.</b> MICs of humimycin A and its alanine scan analogs              | 11 |
| <b>Supplementary Table 4.</b> MICs of humimycin A against various clinical isolates of MRSA | 12 |
| <b>Supplementary Table 5.</b> List of SNPs in SAV1754 that confer humimycin A resistance    | 13 |
| <b>Supplementary Table 6.</b> Overexpression of SAV1754 confers humimycin A resistance      | 14 |

**Supplementary Figure 1. Stereochemistry assignment of humimycin A.** **a)** Humimycin A used in this study was synthesized in bulk using a racemic mixture of 3-hydroxymyristic acid (HMA), and the resulting pair of diastereomers were separated by HPLC. **b)** The absolute stereochemistry of humimycin A was assigned by comparison to small scale re-syntheses of humimycins using enantiopure (R)- and (S)-HMA. Humimycin A (1) refers to the peptide *N*-acylated with (S)-HMA and shows more potent antibiotic activity (**Supplementary Table 3**). **c)** Structures of humimycin A and its diastereomer. **d)** Solvent gradient for HPLC runs. Characterization and purification were carried out on an Agilent instrument at 4 mL/min using an XBridge BEH C18 column (130 Å, 5 µm, 4.6 x 150 mm, Waters Corporation). Solvent A and B are water and acetonitrile with 0.1% TFA, respectively.

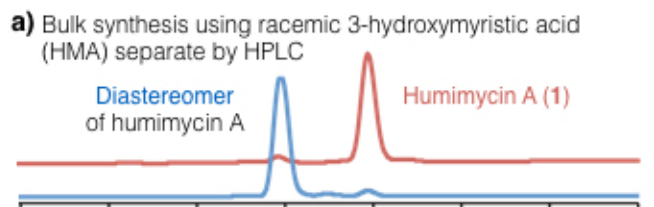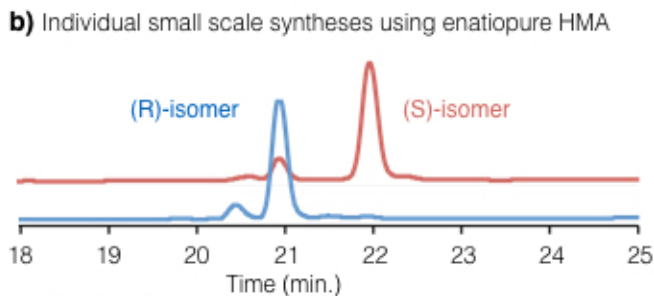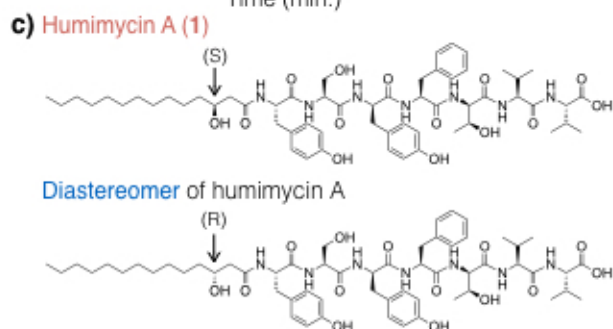

**d)** HPLC gradient

| Time (min.)   | 0 | 1.5 | 5  | 35 | 38 |
|---------------|---|-----|----|----|----|
| Solvent B (%) | 5 | 5   | 35 | 95 | 95 |

**Supplementary Figure 2. Scope of the syn-BNP approach.** **a)** Cumulative counts of completed bacterial genomes in GenBank (blue bars) and NRPS gene clusters amenable to the syn-BNP approach (red bars). **b)**

Our analysis of Minimum Information about a Biosynthetic Gene Cluster (MIBiG, <http://mibig.secondarymetabolites.org>) indicates that the existing bioinformatic tools correctly predicted the core peptide encoded by the vast majority of well studied NRPS gene clusters. Overall 303 adenylation domains from 42 NRPS gene clusters (containing  $\geq 3$  modules, full information available) were analyzed. “Correct” predictions include those identical to the natural product as well as the following nearly exact matches: Val/Leu/Ile, Dab/Orn/Lys, Asp/Glu, Asn/Gln. Predictions were deemed “close” in case of “correct” predictions that have additional modifications, e.g.,  $\beta$ -hydroxylation,  $\beta$ -methylation, etc.

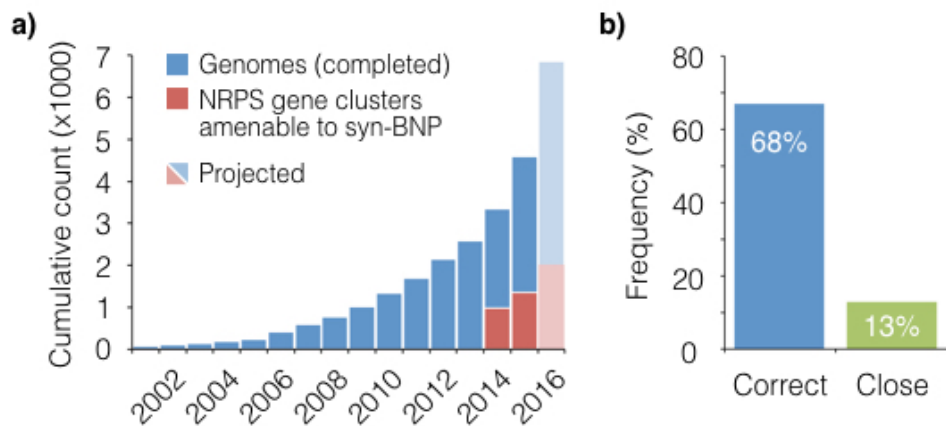

**Supplementary Figure 3. SNPs in SAV1754 that confer humimycin A resistance.** We selected *S. aureus* USA300 mutants that could survive on 2.5 times the MIC (20  $\mu\text{g}/\text{mL}$ ) and sequenced the genome of 23 resistant mutants. Upon comparison to the parent strain, we found that all 23 mutants contained one non-synonymous mutation in SAV1754. Sixteen of the 23 are unique mutations and displayed below.

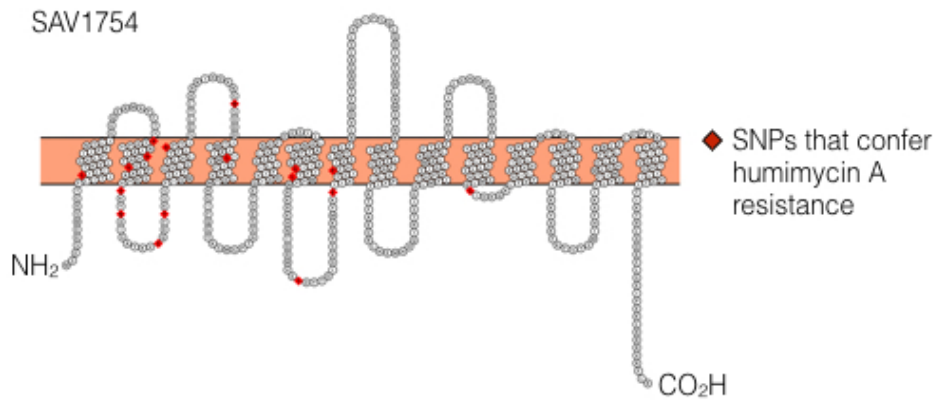

Supplementary Figure 4. <sup>1</sup>H NMR spectrum of humimycin A

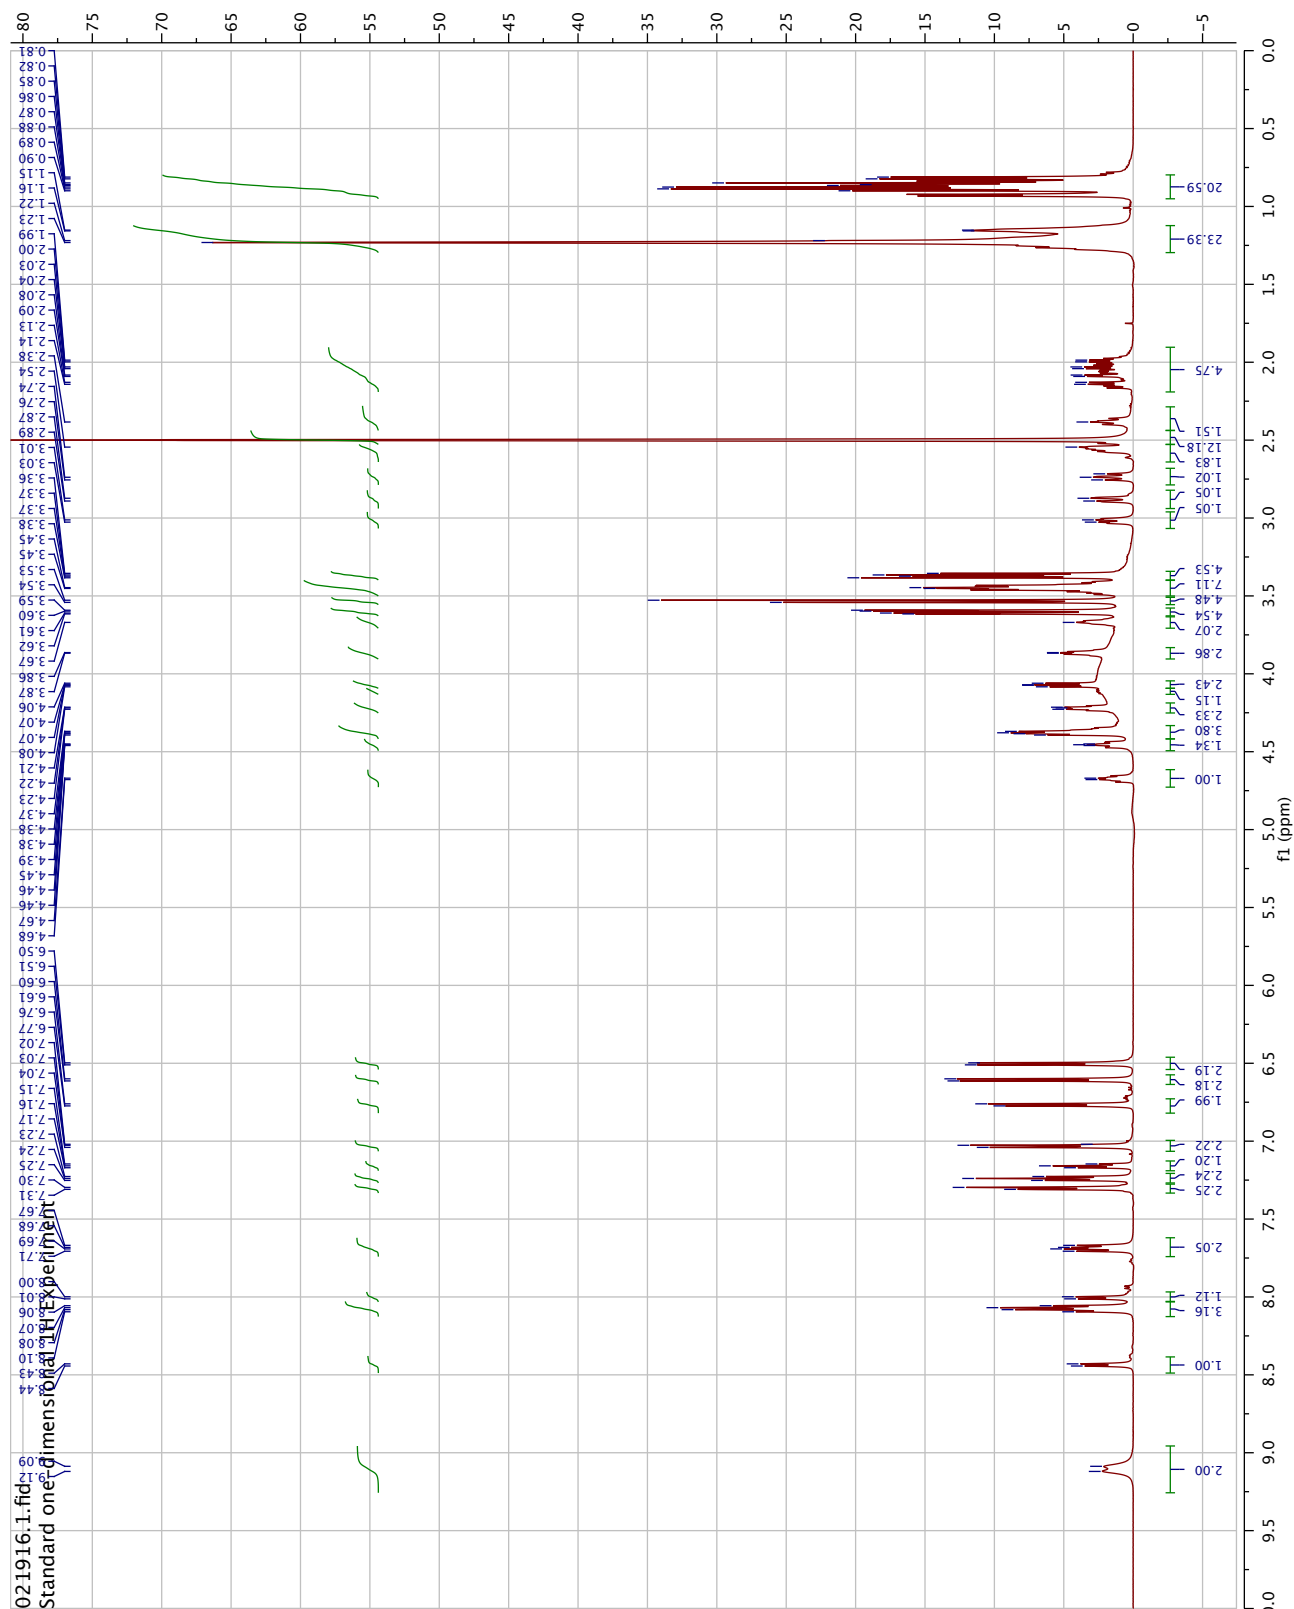

**Supplementary Figure 5.**  $^{13}\text{C}$  NMR spectrum of humimycin A

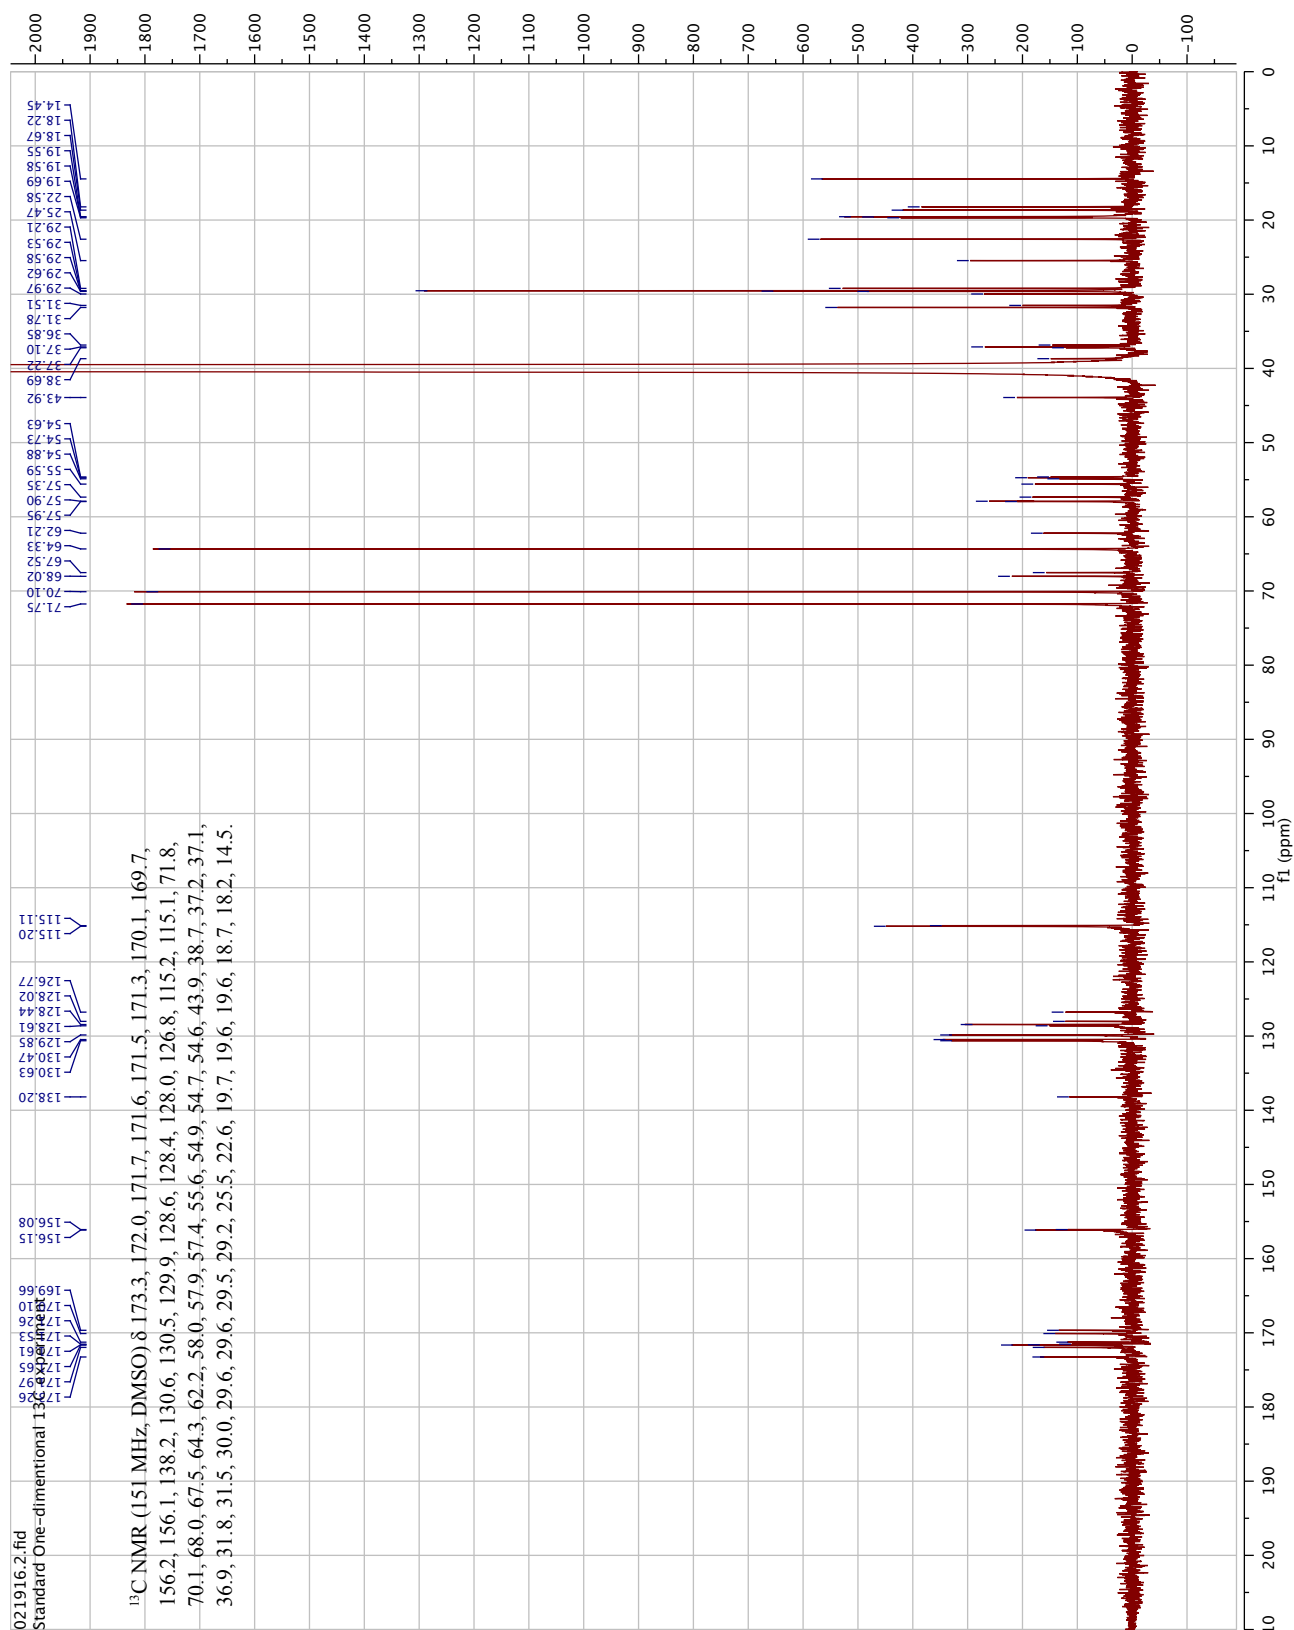





Supplementary Figure 7. <sup>13</sup>C NMR spectrum of humimycin B

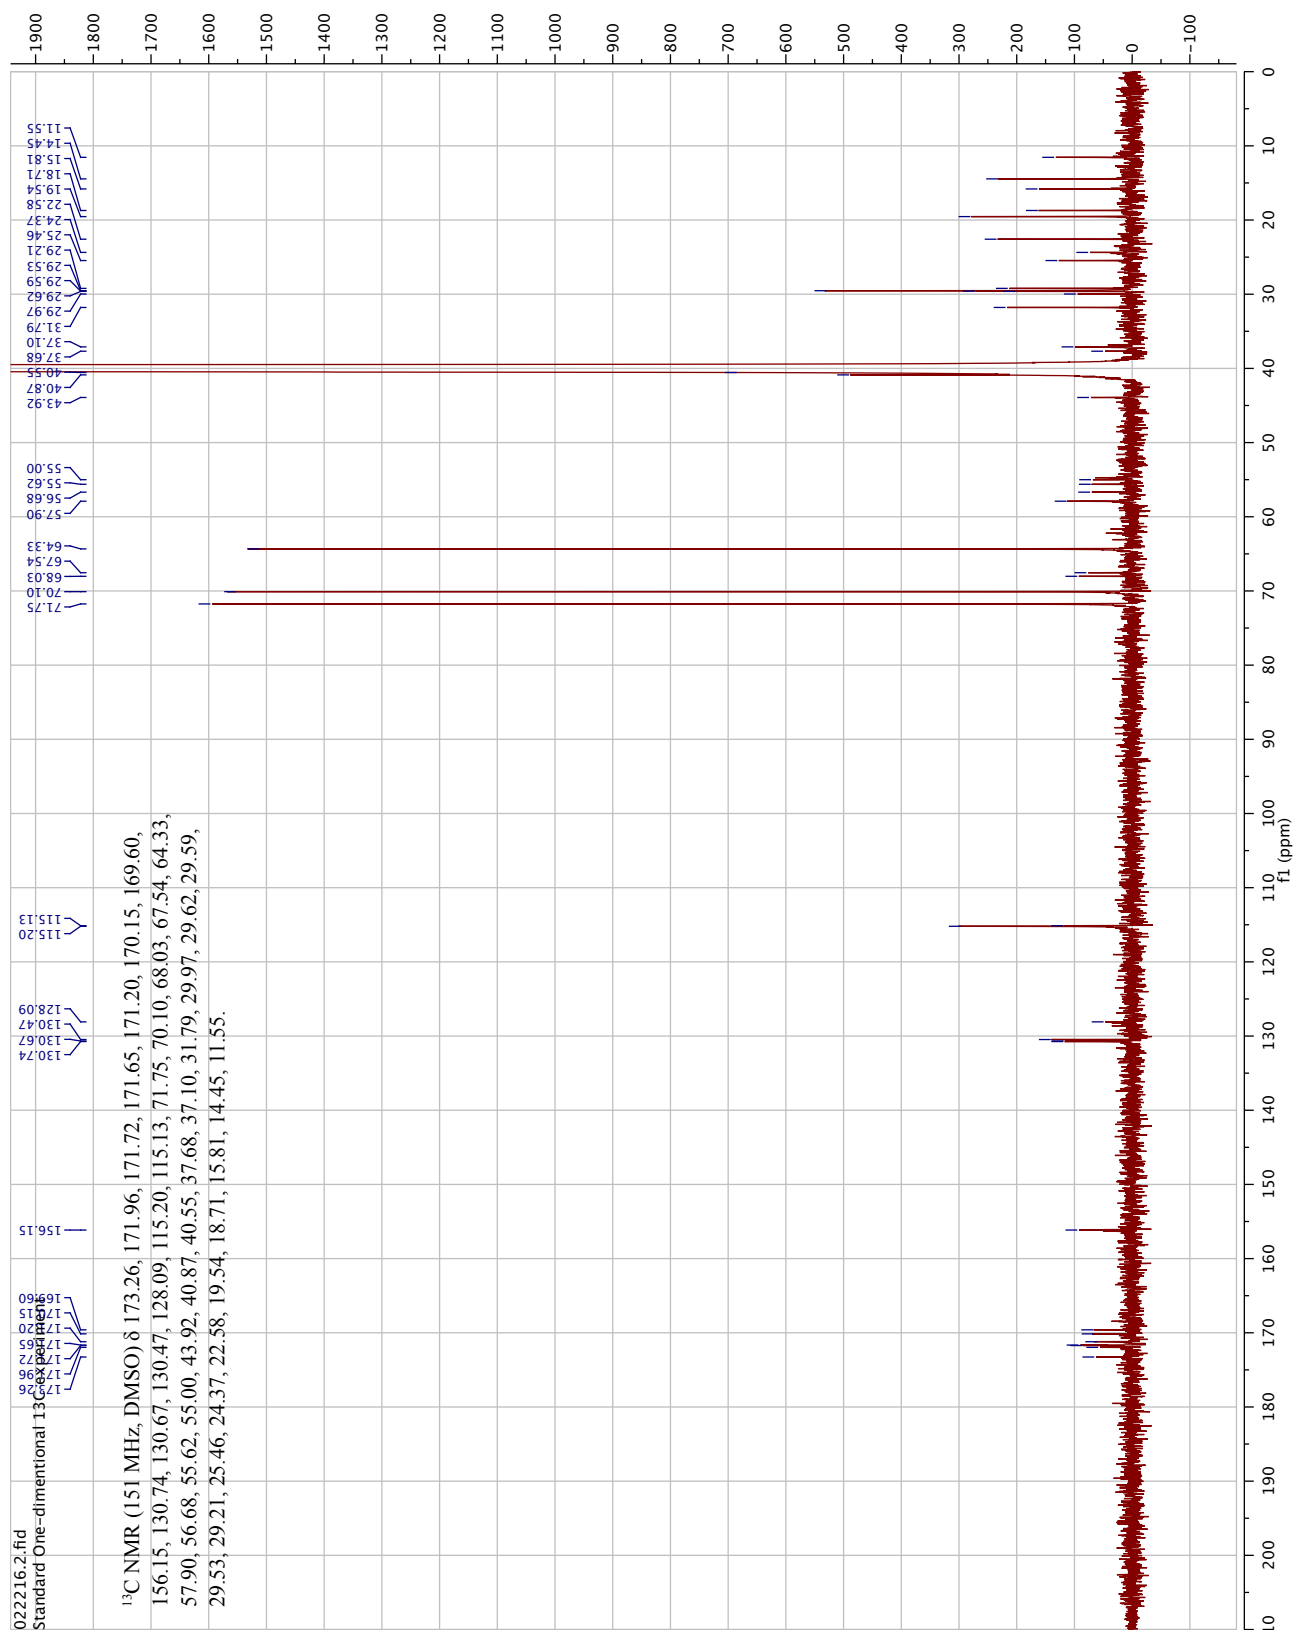

Supplementary Table 1. List of all syn-BNPs for this study

| No.                             | Name                   | N-Cap                   | 1     | 2     | 3     | 4     | 5     | 6     | 7     | 8     | 9     | 10  | 11  | 12  | 13 | MW     | IsomS  | Obsd MS | Ion    | Organism of origin                                         | Genome       | Cl. |
|---------------------------------|------------------------|-------------------------|-------|-------|-------|-------|-------|-------|-------|-------|-------|-----|-----|-----|----|--------|--------|---------|--------|------------------------------------------------------------|--------------|-----|
| 1                               | Human.1                | β-Hydroxymyristic acid  | Tyr   | Ser   | D-Tyr | Tyr   | D-Thr | Ile   | Val   |       |       |     |     |     |    | 1134.4 | 1133.6 | 1156.6  | [M+Na] | <i>Rhodococcus erythropolis</i> SK121                      | β: 229493936 | 2   |
| 2                               | Human.2                | none (NH <sub>2</sub> ) | D-Tyr | Ser   | Ser   | Ser   | Thr   | Gly   | Ser   |       |       |     |     |     |    | 687.7  | 687.2  | 688.3   |        | <i>Rhodococcus erythropolis</i> SK121                      | β: 229491953 | 1   |
| 3                               | Human.3                | β-Hydroxymyristic acid  | Tyr   | Ser   | D-Tyr | Phe   | D-Thr | Val   | Val   |       |       |     |     |     |    | 1104.4 | 1103.6 | 1104.2  |        | <i>Rhodococcus equi</i> ATCC 33707                         | β: 326328562 | 2   |
| 4                               | Human.4                | none (NH <sub>2</sub> ) | Gly   | Orn   | D-Ser | Ser   | Ser   | Gly   | Phe   | Val   |       |     |     |     |    | 893.1  | 892.5  | 893.55  |        | <i>Paenibacillus</i> sp. HGF7                              | β: 334134556 | 1   |
| 5                               | Human.5v1              | β-Hydroxymyristic acid  | D-Thr | Ser   | Ala   | Ser   | Leu   | D-Gln | Orn   |       |       |     |     |     |    | 946.2  | 945.6  | 946.6   |        | <i>Bacillus</i> sp. 7. 6. 55CFAA CT2                       | β: 365164252 | 2   |
| 6                               | Human.6                | none (NH <sub>2</sub> ) | Leu   | D-Ser | D-Arg | Lys   | Orn   | Thr   |       |       |       |     |     |     |    | 717.9  | 717.5  | 718.45  |        | <i>Pseudomonas</i> sp. 2. 1. 26                            | β: 355654810 | 2   |
| 7                               | Human.7                | none (NH <sub>2</sub> ) | Ala   | Phe   | D-Ala | Ala   | D-Ala | Phe   |       |       |       |     |     |     |    | 596.7  | 596.3  | 597.35  |        | <i>Mycobacterium paratuberculosis</i> ATCC BAA-614         | β: 29612066  | 2   |
| 8                               | Human.8v1              | β-Hydroxymyristic acid  | Tyr   | Glu   | D-Asp | D-Glu | D-Gln |       |       |       |       |     |     |     |    | 909.0  | 908.4  | 909.5   |        | <i>Rhodococcus equi</i> ATCC 33707                         | β: 326328562 | 3   |
| 9                               | Human.8v2              | β-Hydroxymyristic acid  | Tyr   | Lys   | D-Lys | D-Glu | D-Glu |       |       |       |       |     |     |     |    | 921.5  | 922.1  | 922.55  |        | <i>Rhodococcus equi</i> ATCC 33707                         | β: 326328562 | 3   |
| 10                              | Oral.1                 | β-Hydroxymyristic acid  | Glu   | D-Orn | Tyr   | D-Thr | Glu   | D-Val | Pro   | Glu   | D-Tyr | Ile |     |     |    | 1482.7 | 1481.8 | 1481.55 | [M+H]  | <i>Bacillus subtilis</i> BS515                             | β: 320017650 | 1   |
| 11                              | Oral.2                 | none (NH <sub>2</sub> ) | D-Ser | Lys   | Gly   | Orn   | D-Ser | Ser   | Gly   | Lys   | D-Orn | Ser |     |     |    | 965.1  | 964.5  | 965.55  |        | <i>Pseudomonas fluorescens</i> SS101                       | β: 38797393  | 2   |
| 12                              | Oral.3                 | none (NH <sub>2</sub> ) | Asp   | D-Orn | Dab   | Thr   | Ala   | D-Ala | D-Orn | Dab   |       |     |     |     |    | 804.9  | 804.5  | 805.5   |        | <i>Pseudomonas protegens</i> Pf-5                          | β: 68342549  | 3   |
| 13                              | Oral.4v1               | none (NH <sub>2</sub> ) | D-Asp | Orn   | D-Phe | Gly   | D-Orn | D-Glu | Gly   | Orn   |       |     |     |     |    | 895.9  | 895.4  | 897.4   |        | <i>Bradyrhizobium elkanii</i> WSM1741                      | β: 548696015 | 1   |
| 14                              | Oral.4v2               | none (NH <sub>2</sub> ) | D-Asp | Orn   | D-Phe | Gly   | D-Orn | D-Glu | Gly   | Orn   |       |     |     |     |    | 865.9  | 865.4  | 866.45  |        | <i>Bradyrhizobium elkanii</i> WSM1741                      | β: 548696015 | 1   |
| 15                              | Oral.5                 | β-Hydroxymyristic acid  | Phe   | Glu   | Asp   | Ile   | Thr   | Leu   | Ala   | Pro   |       |     |     |     |    | 1131.4 | 1130.7 | 1129.5  | [M+H]  | <i>Uncultured bacterium</i> ACQ_77C00477                   | β: 40683084  | 1   |
| 16                              | Oral.6                 | none (NH <sub>2</sub> ) | D-Leu | D-Thr | D-Ile | D-Leu | D-Ser | Leu   | D-Ser | Ile   |       |     |     |     |    | 859.1  | 858.5  | 859.55  |        | <i>Pseudomonas fluorescens</i> SS101                       | β: 38797393  | 1   |
| 17                              | Oral.7                 | β-Hydroxymyristic acid  | Asn   | D-Tyr | D-Asn | Gln   | Pro   | D-Ser | Asn   |       |       |     |     |     |    | 1062.2 | 1061.5 | 1084.5  | [M+Na] | <i>Bacillus subtilis</i> subsp. <i>spizizenii</i> str. WZ3 | β: 305410941 | 4   |
| 18                              | Oral.8                 | none (NH <sub>2</sub> ) | D-Ser | Arg   | D-Ser | Orn   | Lys   | Orn   | Thr   | Thr   |       |     |     |     |    | 907.0  | 906.5  | 907.5   |        | <i>Pseudomonas aeruginosa</i> UCGPP-P414                   | β: 115583796 | 4   |
| 19                              | Oral.9v1               | none (NH <sub>2</sub> ) | D-Ser | D-Orn | Orn   | Gly   | D-Thr | Ser   | Glu   |       |       |     |     |     |    | 692.8  | 692.4  | 693.4   |        | <i>Pseudomonas aeruginosa</i> PA7                          | β: 150938624 | 3   |
| 20                              | Oral.9v2               | none (NH <sub>2</sub> ) | D-Ser | D-Orn | Glu   | Gly   | D-Thr | Ser   | Glu   |       |       |     |     |     |    | 722.7  | 722.3  | 723.35  |        | <i>Pseudomonas aeruginosa</i> PA7                          | β: 150938624 | 3   |
| 21                              | Oral.10v1              | none (NH <sub>2</sub> ) | Glu   | Orn   | Glu   | Dab   | Asp   | D-Orn | Gly   |       |       |     |     |     |    | 762.8  | 762.4  | 763.3   |        | <i>Ralstonia pickettii</i> DT0602                          | β: 546340292 | 1   |
| 22                              | Oral.10v2              | none (NH <sub>2</sub> ) | Asp   | Dab   | Glu   | Asp   | D-Orn | Orn   | Gly   |       |       |     |     |     |    | 762.8  | 762.4  | 763.35  |        | <i>Ralstonia pickettii</i> DT0602                          | β: 546340292 | 1   |
| 23                              | Oral.11                | β-Hydroxymyristic acid  | Leu   | D-Ser | Pro   | Val   | Cys   | Gly   |       |       |       |     |     |     |    | 801.1  | 800.5  | 801.4   |        | <i>Streptococcus mutans</i> TC1-145                        | β: 349996068 | 1   |
| 24                              | Oral.12                | none (NH <sub>2</sub> ) | Ser   | D-Asp | Ser   | Orn   | Ser   |       |       |       |       |     |     |     |    | 508.5  | 508.2  | 509.25  |        | <i>Achromobacter xylosoxidans</i> A8                       | β: 310797913 | 1   |
| 25                              | Oral.13                | none (NH <sub>2</sub> ) | Ala   | Leu   | MeOrn | Ser   | Thr   |       |       |       |       |     |     |     |    | 532.6  | 532.3  | 533.35  |        | <i>Mycobacterium neoaurum</i> ATCC 25795                   | β: 65328430  | 1   |
| No.                             | Name                   | N-Cap                   | 1     | 2     | 3     | 4     | 5     | 6     | 7     | 8     | 9     | 10  | 11  | 12  | 13 | MW     | IsomS  | Obsd MS | Ion    | Organism of origin                                         | Genome       | Cl. |
| <b>Failed peptide syntheses</b> |                        |                         |       |       |       |       |       |       |       |       |       |     |     |     |    |        |        |         |        |                                                            |              |     |
| Human.5v2                       | β-Hydroxymyristic acid | D-Thr                   | Gln   | Ala   | Ser   | Leu   | D-Glu | Glu   |       |       |       |     |     |     |    | 1003.2 | 1002.6 |         |        | <i>Bacillus</i> sp. 7. 6. 55CFAA CT2                       | β: 365164252 | 2   |
| Human.9                         | β-Hydroxymyristic acid | Ser                     | Glu   | Phe   | Asp   | Ser   | Ser   | Ser   | Phe   | Ser   | Phe   | Ser | Leu | Ser |    | 1622.8 | 1651.8 |         |        | <i>Rhodococcus equi</i> ATCC 33707                         | β: 326328562 | 7   |
| Human.10                        | β-Hydroxymyristic acid | D-Ala                   | Thr   | D-Ala | Leu   | D-Thr | Leu   | Phe   |       |       |       |     |     |     |    | 962.2  | 961.6  |         |        | <i>Rhodococcus equi</i> ATCC 33707                         | β: 326328562 | 5   |
| Human.11                        | β-Hydroxymyristic acid | Phe                     | Leu   | Thr   | Phe   | Tyr   | Tyr   |       |       |       |       |     |     |     |    | 1079.4 | 1078.6 |         |        | <i>Rhodococcus equi</i> ATCC 33707                         | β: 326328562 | 6   |
| Oral.14                         | β-Hydroxymyristic acid | D-Leu                   | D-Asp | D-Thr | D-Ile | D-Leu | D-Ser | Leu   | Leu   | D-Ser | Ile   |     |     |     |    | 1313.7 | 1312.9 |         |        | <i>Pseudomonas protegens</i> Pf-5                          | β: 68342549  | 1   |

**Supplementary Table 2. Bacteria strain information**

| a)                             | Name of Bacteria                       | Strain                 | Media  | Resistance                |
|--------------------------------|----------------------------------------|------------------------|--------|---------------------------|
| ESKAPE pathogens               | <i>Enterococcus faecium</i>            | Com15                  | LB     |                           |
|                                | <i>Staphylococcus aureus</i>           | USA300                 | LB     | Methicillin               |
|                                | <i>Klebsiella pneumoniae</i>           | ATCC 10031             | LB     |                           |
|                                | <i>Acinetobacter baumannii</i>         | ATCC 17978             | LB     |                           |
|                                | <i>Pseudomonas aeruginosa</i>          | PAO1                   | LB     |                           |
|                                | <i>Enterobacter cloacae</i>            | ATCC 14037             | LB     |                           |
| Various MRSA strains           | <i>Staphylococcus aureus</i>           | ATCC BAA-42            | LB     | Methicillin               |
|                                | <i>Staphylococcus aureus</i>           | NRS100                 | LB     | Methicillin, tetracycline |
|                                | <i>Staphylococcus aureus</i>           | NRS108                 | LB     | Gentamicin                |
|                                | <i>Staphylococcus aureus</i>           | ATCC BAA-1721          | LB     | Hyper-virulent            |
|                                | <i>Staphylococcus aureus</i>           | NRS281                 | LB     | Erythromycin              |
|                                | <i>Staphylococcus aureus</i>           | NRS22                  | LB     | Vancomycin                |
|                                | <i>Staphylococcus aureus</i>           | USA800                 | LB     | Methicillin               |
|                                | <i>Staphylococcus aureus</i>           | USA500                 | LB     | Methicillin               |
|                                | <i>Staphylococcus aureus</i>           | USA300                 | LB     | Methicillin               |
|                                | <i>Staphylococcus aureus</i>           | USA200                 | LB     | Methicillin               |
|                                | <i>Staphylococcus aureus</i>           | USA100                 | LB     | Methicillin               |
| Staphylo-<br>cocci             | <i>Staphylococcus intermedius</i>      | NCTC 11048             | LB     |                           |
|                                | <i>Staphylococcus delphini</i>         | 8086                   | LB     |                           |
|                                | <i>Staphylococcus pseudintermedius</i> | ED99                   | LB     |                           |
| b)                             | Name of Bacteria                       | Strain                 | Media  | Resistance                |
| Actino-<br>bacteria            | <i>Bifidobacterium adolescentis</i> *  | L2-32                  | LYBHI  |                           |
|                                | <i>Bifidobacterium longum</i> *        | CCUG 52486             | LYBHI  |                           |
|                                | <i>Corynebacterium amycolactum</i> §   | SK46                   | LYBHI  |                           |
|                                | <i>Rhodococcus erythropolis</i>        | ATCC 11048             | BHI    |                           |
|                                | <i>Rothia dentocariosa</i>             | M567                   | LYBHI  |                           |
|                                | <i>Rothia mucilaginoso</i> §           | CC87LB                 | LYBHI  |                           |
| Bacter-<br>oidetes             | <i>Bacteroides dorei</i> *             | 5_1_36/D4              | LYBHI  |                           |
|                                | <i>Bacteroides finegoldii</i> *        | CL09T03C10             | LYBHI  |                           |
|                                | <i>Parabacteroides merdae</i> *        | CL03T12C32             | LYBHI  |                           |
|                                | <i>Prevotella melaninogenica</i> *     | D10                    | LYBHI  |                           |
| Firmicutes                     | <i>Bacillus subtilis</i>               | 168 1A1                | LYBHI  |                           |
|                                | <i>Eubacterium sp.</i> *               | 3_1_31                 | LYBHI  |                           |
|                                | <i>Staphylococcus aureus</i>           | RN4220                 | LB/BHI |                           |
|                                | <i>Staphylococcus aureus</i>           | USA300                 | LB     | Methicillin               |
|                                | <i>Staphylococcus epidermidis</i>      | RP62A                  | LB     | Methicillin               |
|                                | <i>Streptococcus mitis</i>             | B6                     | LYBHI  |                           |
|                                | <i>Streptococcus mutans</i>            | UA159                  | LYBHI  |                           |
|                                | <i>Streptococcus pneumoniae</i>        | TCH8431/19A            | BHI    |                           |
| <i>Streptococcus sanguinis</i> | SK36                                   | BHI                    |        |                           |
| Proteo-<br>bacteria            | <i>Escherichia coli</i>                | LF82                   | LB     |                           |
|                                | <i>Neisseria mucosa</i>                | ATCC 25996             | LYBHI  |                           |
|                                | <i>Salmonella enterica</i>             | subsp. <i>enterica</i> | LYBHI  |                           |

- Superscripts denote special growth conditions, i.e., anaerobic atmosphere (\*) and 30°C incubation(§).
- The LYBHI medium contains (per liter) brain heart infusion (BHI, 37 g), yeast extract (5 g), maltose (1 g), cellobiose (1 g), cysteine (0.5 g), and hemin (5 mg).

**Supplementary Table 3.** MICs of humimycin A and its alanine scan analogs

| Name <sup>c</sup> | Sequence <sup>de</sup> | MIC ( $\mu\text{g/mL}$ ) <sup>ab</sup> |                               |
|-------------------|------------------------|----------------------------------------|-------------------------------|
|                   |                        | (R) diastereomer <sup>f</sup>          | (S) diastereomer <sup>f</sup> |
| Original syn-BNP  | HMA-YSyFtVV            | 32                                     | 8 (humimycin A, <b>1</b> )    |
| Ala1              | HMA- <b>A</b> SyFtVV   | >                                      | >                             |
| Ala2              | HMA-Y <b>A</b> yFtVV   | >                                      | >                             |
| Ala3              | HMA-YS <b>a</b> FtVV   | >                                      | >                             |
| Ala4              | HMA-YSy <b>A</b> tVV   | >                                      | >                             |
| Ala5              | HMA-YSyF <b>a</b> VV   | >                                      | >                             |
| Ala6              | HMA-YSyFt <b>A</b> V   | >                                      | 32                            |
| Ala7              | HMA-YSyFt <b>V</b> A   | >                                      | >                             |

<sup>a</sup> Minimal inhibitory concentration (MIC) values are expressed in units of  $\mu\text{g/mL}$ .

<sup>b</sup> ">" denotes MIC values greater than 128  $\mu\text{g/mL}$  (highest concentration tested).

<sup>c</sup> Alanine substitution analogs were synthesized on 2-chlorotrityl resins. The first amino acid (1.2 equiv.) was loaded in the presence of DIEA (3 equiv.) and capped by DCM/MeOH/DIEA (80:15:5) treatment for 30 min. The rest of the SPPS steps were identical to those described in *Peptide Synthesis* section of the *Online Methods*.

<sup>d</sup> HMA denotes *N*-terminal modification with 3-hydroxymyristic acid (MHMA).

<sup>e</sup> Amino acids are abbreviated using standard 1-letter codes; upper and lower case letters denote amino acids in L- and D- forms, respectively.

<sup>e</sup> Humimycin A (**1**) refers to the syn-BNP *N*-acylated with the (S)-HMA (**Supplementary Figure S1**).

**Supplementary Table 4.** MICs of humimycin A against various clinical isolates of MRSA

| <b>Strain</b> | <b>MIC (<math>\mu\text{g/mL}</math>)</b> |
|---------------|------------------------------------------|
| USA300        | 8                                        |
| BAA-42        | 8                                        |
| NRS108        | 8                                        |
| NRS22         | 8                                        |
| USA100        | 8                                        |
| USA200        | 16                                       |
| USA800        | 16                                       |
| BAA-1721      | 32                                       |
| NRS100        | 128                                      |

**Supplementary Table 5. List of SNPs in SAV1754 that confer humimycin A resistance**

| Non-SAV1754 mutations |           | Mutations within SAV1754 |      |     |     |              |        |           |         |                                        |           |                                             |
|-----------------------|-----------|--------------------------|------|-----|-----|--------------|--------|-----------|---------|----------------------------------------|-----------|---------------------------------------------|
| MUTANT                | CHROM     | POS                      | TYPE | REF | ALT | EVIDENCE     | STRAND | NT_POS    | AA_POS  | EFFECT                                 | LOCUS_TAG | GENE_PRODUCT                                |
| 1                     | NC_007793 | 1875948                  | SNP  | C   | T   | T:65 C:0     | -      | 169/1662  | 57/553  | missense_variant c.169G>A p.Ala57Thr   | RS09285   | polysaccharide biosynthesis protein         |
| 2                     | NC_007793 | 1874892                  | SNP  | C   | T   | T:50 C:0     | -      | 1225/1662 | 409/553 | missense_variant c.1225G>A p.Gly409Ser | RS09285   | polysaccharide biosynthesis protein         |
| 3                     | NC_007793 | 1875468                  | SNP  | G   | A   | A:144 G:0    | -      | 649/1662  | 217/553 | missense_variant c.649C>T p.Leu217Phe  | RS09285   | polysaccharide biosynthesis protein         |
| 4                     | NC_007793 | 1876068                  | SNP  | T   | C   | C:43 T:0     | -      | 49/1662   | 17/553  | missense_variant c.49A>G p.Ser17Gly    | RS09285   | polysaccharide biosynthesis protein         |
| 5                     | NC_007793 | 1874892                  | SNP  | C   | T   | T:34 C:0     | -      | 1225/1662 | 409/553 | missense_variant c.1225G>A p.Gly409Ser | RS09285   | polysaccharide biosynthesis protein         |
| 6                     | NC_007793 | 1875894                  | SNP  | T   | A   | A:69 T:0     | -      | 223/1662  | 75/553  | missense_variant c.223A>T p.Asn75Tyr   | RS09285   | polysaccharide biosynthesis protein         |
| 7                     | NC_007793 | 1875791                  | SNP  | G   | A   | A:69 G:0     | -      | 326/1662  | 109/553 | missense_variant c.326C>T p.Ala109Val  | RS09285   | polysaccharide biosynthesis protein         |
| 8                     | NC_007793 | 1875948                  | SNP  | C   | T   | T:57 C:0     | -      | 169/1662  | 57/553  | missense_variant c.169G>A p.Ala57Thr   | RS09285   | polysaccharide biosynthesis protein         |
| 9                     | NC_007793 | 1875903                  | SNP  | C   | T   | T:66 C:0     | -      | 214/1662  | 72/553  | missense_variant c.214G>A p.Ala72Thr   | RS09285   | polysaccharide biosynthesis protein         |
| 10                    | NC_007793 | 1875416                  | SNP  | G   | A   | A:120 G:0    | -      | 701/1662  | 234/553 | missense_variant c.701C>A p.Pro234Phe  | RS09285   | polysaccharide biosynthesis protein         |
| 11                    | NC_007793 | 1875350                  | SNP  | G   | T   | T:41 G:1     | -      | 767/1662  | 256/553 | missense_variant c.767C>A p.Pro256Gln  | RS09285   | polysaccharide biosynthesis protein         |
| 12                    | NC_007793 | 1875737                  | SNP  | C   | A   | A:32 C:0     | -      | 380/1662  | 127/553 | missense_variant c.380G>T p.Trp127Leu  | RS09285   | polysaccharide biosynthesis protein         |
| 13                    | NC_007793 | 1875974                  | SNP  | G   | A   | A:43 G:0     | -      | 143/1662  | 48/553  | missense_variant c.143C>T p.Ala48Val   | RS09285   | polysaccharide biosynthesis protein         |
| 14                    | NC_007793 | 1875736                  | SNP  | C   | G   | G:28 C:0     | -      | 381/1662  | 127/553 | missense_variant c.381G>C p.Trp127Cys  | RS09285   | polysaccharide biosynthesis protein         |
| 15                    | NC_007793 | 1875869                  | SNP  | C   | T   | T:15 C:0     | -      | 248/1662  | 83/553  | missense_variant c.248G>A p.Ser83Asn   | RS09285   | polysaccharide biosynthesis protein         |
| 16                    | NC_007793 | 1875372                  | SNP  | C   | G   | G:9 C:0      | -      | 745/1662  | 249/553 | missense_variant c.745G>C p.Glu249Gln  | RS09285   | polysaccharide biosynthesis protein         |
| 17                    | NC_007793 | 1875792                  | SNP  | C   | T   | T:44 C:0     | -      | 325/1662  | 109/553 | missense_variant c.325G>A p.Ala109Thr  | RS09285   | polysaccharide biosynthesis protein         |
| 18                    | NC_007793 | 1875902                  | SNP  | G   | A   | A:46 G:0     | -      | 215/1662  | 72/553  | missense_variant c.215C>T p.Ala72Val   | RS09285   | polysaccharide biosynthesis protein         |
| 19                    | NC_007793 | 1875930                  | SNP  | C   | A   | A:85 C:2     | -      | 187/1662  | 63/553  | missense_variant c.187G>T p.Val63Leu   | RS09285   | polysaccharide biosynthesis protein         |
| 20                    | NC_007793 | 1875698                  | SNP  | C   | G   | G:67 C:0     | -      | 419/1662  | 140/553 | missense_variant c.419G>C p.Ser140Thr  | RS09285   | polysaccharide biosynthesis protein         |
| 21                    | NC_007793 | 1875480                  | SNP  | C   | T   | T:206 C:0    | -      | 637/1662  | 213/553 | missense_variant c.637G>A p.Gly213Ser  | RS09285   | polysaccharide biosynthesis protein         |
| 22                    | NC_007793 | 1875857                  | SNP  | T   | A   | A:102 T:0    | -      | 260/1662  | 87/553  | missense_variant c.260A>T p.Tyr87Phe   | RS09285   | polysaccharide biosynthesis protein         |
| 23                    | NC_007793 | 1874892                  | SNP  | C   | T   | T:56 C:1     | -      | 1225/1662 | 409/553 | missense_variant c.1225G>A p.Gly409Ser | RS09285   | polysaccharide biosynthesis protein         |
|                       | NC_007793 | 1875870                  | SNP  | T   | A   | A:30 T:0     | -      | 247/1662  | 83/553  | missense_variant c.247A>T p.Ser83Cys   | RS09285   | polysaccharide biosynthesis protein         |
| 2                     | NC_007793 | 813007                   | SNP  | A   | G   | G:93 A:0     | -      | 239/642   | 80/213  | missense_variant c.239T>C p.Val80Ala   | RS03940   | hypothetical protein                        |
| 5                     | NC_007791 | 2378                     | SNP  | A   | A   | A:6692 G:0   | -      | 778/1242  | 260/413 | missense_variant c.778G>A p.Glu260Lys  | RS14730   | Plasmid recombination enzyme type 3         |
| 8                     | NC_007791 | 2378                     | SNP  | G   | A   | A:6882 G:8   | +      | 778/1242  | 260/413 | missense_variant c.778G>A p.Glu260Lys  | RS14730   | Plasmid recombination enzyme type 3         |
| 10                    | NC_007793 | 2363468                  | SNP  | G   | T   | T:234 G:1    | -      | 221/360   | 74/119  | missense_variant c.221C>A p.Thr74Asn   | RS12070   | 50S ribosomal protein L18                   |
| 12                    | NC_007793 | 626985                   | SNP  | C   | T   | T:60 C:0     | -      | 419/1666  | 140/221 | missense_variant c.419G>A p.Arg140His  | RS02945   | bacillithiol biosynthesis deacetylase BshB2 |
| 14                    | NC_007793 | 2433481                  | SNP  | A   | C   | C:30 A:0     | -      | 606/873   | 202/290 | missense_variant c.606C>G p.Ile202Met  | RS00565   | membrane protein                            |
| 17                    | NC_007793 | 2350655                  | SNP  | G   | A   | A:47 G:0     | -      | 248/294   | 83/97   | missense_variant c.248C>T p.Thr83Ile   | RS11970   | helicase                                    |
| 18                    | NC_007791 | 2378                     | SNP  | G   | A   | A:9202 G:6   | +      | 778/1242  | 260/413 | missense_variant c.778G>A p.Glu260Lys  | RS14730   | Plasmid recombination enzyme type 3         |
| 22                    | NC_007791 | 2378                     | SNP  | G   | A   | A:8436 G:102 | +      | 778/1242  | 260/413 | missense_variant c.778G>A p.Glu260Lys  | RS14730   | Plasmid recombination enzyme type 3         |

**Summary**

The following table lists all SNPs acquired through one round of resistance selection. Among 23 fully sequenced mutants, 22 acquired a single point mutation on protein SAV1754 and 1 acquired two mutations. A number of these mutants (9) acquired mutations, in addition to SAV1754, located elsewhere in the genome

## Supplementary Table 6. Overexpression of SAV1754 confers humimycin A resistance.

### a) Primers for the amplification of SAV1754<sup>a</sup>

---

|          |                                                              |
|----------|--------------------------------------------------------------|
| Primer F | gcgcgagctcagaggaggactctctc <b>ATG</b> AGTGAAAGTAAAGAAATGGTGC |
| Primer R | gcgcggtacc <b>TCAT</b> CGTAAAAACCTAACTCTACGTC                |

---

### b) PCR protocol

---

|        |                           |
|--------|---------------------------|
| Step 1 | 98°C for 8 min            |
| Step 2 | 98°C for 30 sec           |
| Step 3 | 62°C for 30 sec           |
| Step 4 | 72°C for 2 min            |
| Step 5 | Go to Step 2 for 32 times |
| Step 6 | 72°C for 8 min            |

---

### c) Susceptibility to humimycin A of *S. aureus* hosting various plasmids<sup>bc</sup>

---

| Insert                | Vector | MIC (µg/mL) <sup>d</sup> |
|-----------------------|--------|--------------------------|
| Empty vector          | pRMC2  | 8                        |
| SAV1754 (WT)          | pRMC2  | >128                     |
| SAV1754 (mutant no.8) | pRMC2  | >128                     |

---

<sup>a</sup> Start and stop codons of the SAV1754 gene (upper case) are in bold; restriction sites for cloning are underlined (*SacI/KpnI*); ribosome binding sequence was built into the forward primer (lower case).

<sup>b</sup> The SAV1754 gene was placed under the control of the tetracycline-inducible promoter P<sub>xyI/tetO</sub>.

<sup>c</sup> Empty and recombinant plasmids were transformed into *S. aureus* RN4220.

<sup>d</sup> Minimal inhibitor concentrations (MIC) were tested in the presence of 5 ng/mL of anhydrotetracycline and recorded after 48 h of growth; ">128" denotes MIC values greater than 128 µg/mL (highest concentration tested).
